# Supplementary material for: Two lead borate-nitrates with anion-centered [OPb4] tetrahedra and two types of π-conjugated planar units showing large birefringence
Source: Royal Society of Chemistry journal article supplement (doi:10.1039/d2dt00183g), 2022-01-01
Supplement: d2dt00183g1.pdf [file d2dt00183g1.pdf]

## Two Lead Borate-nitrates with Anion-Centered [OPb<sub>4</sub>] Tetrahedra and Two Types of $\pi$ -Conjugated Planar Units Showing Large Birefringence

Shuo Bai,<sup>a</sup> Daqing Yang,<sup>a</sup> Bingbing Zhang,<sup>a</sup> Ling Li,<sup>b</sup> and Ying Wang<sup>\*a</sup>

<sup>a</sup>College of Chemistry and Environmental Science, Hebei University, Baoding 071002, China.  
Email: wangy@hbu.edu.cn.

<sup>b</sup>College of Physics Science and Technology, Hebei University, Baoding 071002, China.

### Table of contents

|                                                                                                                                                      |     |
|------------------------------------------------------------------------------------------------------------------------------------------------------|-----|
| 1. Experimental section.....                                                                                                                         | S2  |
| 2. Table S1. Crystal data and structure refinements.....                                                                                             | S4  |
| 3. Table S2. Atomic coordinates and equivalent isotropic displacement parameters.....                                                                | S5  |
| 4. Table S3. Bond lengths [Å] and angles [deg].....                                                                                                  | S6  |
| 5. Table S4. Crystallographic data for inorganic compounds containing anion-centered [OPb <sub>4</sub> ] tetrahedra and $\pi$ -conjugated units..... | S7  |
| 6. Figure S1. The calculated and experimental powder XRD patterns.....                                                                               | S8  |
| 7. Figure S2. The IR spectra.....                                                                                                                    | S9  |
| 8. Figure S3. The UV–Vis–NIR diffuse reflectance spectra.....                                                                                        | S10 |
| 9. Figure S4. The TG and DSC curves.....                                                                                                             | S11 |
| 10. Figure S5. The bandgap and the PDOS .....                                                                                                        | S12 |
| 11. Reference.....                                                                                                                                   | ... |
|                                                                                                                                                      | S13 |

## Experimental section

**Synthesis.** All chemicals were used as received without further purification. Single crystals of  $\text{Pb}_6\text{O}_4(\text{BO}_3)(\text{NO}_3)$  and  $\text{Pb}_6\text{O}_2(\text{BO}_3)_2(\text{NO}_3)\text{F}$  were synthesized by using the high-temperature solution method. For  $\text{Pb}_6\text{O}_4(\text{BO}_3)(\text{NO}_3)$ , the raw materials consist of  $\text{PbF}_2$  (0.230 g, 0.9 mmol),  $\text{Pb}(\text{NO}_3)_2$  (2.180 g, 6.6 mmol),  $\text{Na}_2\text{CO}_3$  (0.299 g, 2.8 mmol), and  $\text{H}_3\text{BO}_3$  (0.291 g, 4.7 mmol), while  $\text{PbF}_2$  (0.313 g, 0.9 mmol),  $\text{Pb}(\text{NO}_3)_2$  (1.3 g, 3.8 mmol),  $\text{PbCO}_3$  (1.024 g, 3.8 mmol), and  $\text{H}_3\text{BO}_3$  (0.394 g, 6.4 mmol) were used for the synthesis of  $\text{Pb}_6\text{O}_2(\text{BO}_3)_2(\text{NO}_3)\text{F}$ . The raw materials were mixed and grounded and then transferred into alumina crucibles. For  $\text{Pb}_6\text{O}_4(\text{BO}_3)(\text{NO}_3)$ , the temperature was slowly raised to 500 °C and maintained for 6 h, cooled down to 420 °C in 2 h, and subsequently cooled slowly to 320 °C at a rate of 2 °C·h<sup>-1</sup>, finally decreased rapidly to room temperature in 3 h. For  $\text{Pb}_6\text{O}_2(\text{BO}_3)_2(\text{NO}_3)\text{F}$ , the temperature was slowly raised to 500 °C and held for 6 h, cooled down to 400 °C at a rate of 2 °C·h<sup>-1</sup>, and subsequently cooled to room temperature in 50 h. Small crystals (~0.1 mm) of the title compounds were obtained from the crushed products.

Polycrystalline samples of the title compounds were prepared by the conventional solid-state method. For  $\text{Pb}_6\text{O}_4(\text{BO}_3)(\text{NO}_3)$ ,  $\text{Pb}(\text{NO}_3)_2$ ,  $\text{PbCO}_3$ , and  $\text{H}_3\text{BO}_3$  were weighed according to the stoichiometric ratio, and the raw materials were fully grounded before transferring to an alumina crucible with cover. The sample was first heated to 400 °C in a muffle furnace and held at this temperature for 24 h to decompose  $\text{PbCO}_3$ , then kept at 380 °C for 48 h, and finally calcined at 350 °C for 48h with several times mid-grinding. For  $\text{Pb}_6\text{O}_2(\text{BO}_3)_2(\text{NO}_3)\text{F}$ , the stoichiometric ratio of  $\text{PbF}_2$ ,  $\text{Pb}(\text{NO}_3)_2$ ,  $\text{PbCO}_3$ , and  $\text{H}_3\text{BO}_3$  were ground thoroughly. The mixture was preheated at 300 °C for 24 h, then heated at 350 °C for 24 h and 380 °C for 24 h with intermediate grinding. Yellow polycrystalline powder samples were obtained with high phase purity.

**Characterization.** The single-crystal X-ray diffraction (XRD) data were collected on a Bruker D8 VENTURE diffractometer equipped with a PHOTON II detector and Mo  $\text{I}\mu\text{S}$  3.0 microfocus X-ray sources ( $\lambda = 0.71073$  Å). Data integration and absorption corrections were carried out using the *SAINT* program.<sup>1</sup> The structure solution and

refinement were performed using the Intrinsic Phasing method and the least-squares technique, respectively, embedding within the *Olex2* program.<sup>2</sup> Crystal data and refinement details, atomic coordinates, and selected bond distances and angles are listed in Tables S1-S3. Powder XRD data were measured on a Dandong Haoyuan DX-27mini X-ray diffractometer with Cu K $\alpha$  radiation ( $\lambda = 1.54056 \text{ \AA}$ ). The powder XRD pattern was scanned over the  $2\theta$  angles range of  $5-70^\circ$ , at a scanning step width of  $0.02^\circ$  and a fixed counting time of 2 s. The thermal gravimetric (TG) analysis and differential scanning calorimetry (DSC) were studied with a NETZSCH5 instrument under air. The sample was placed in an  $\text{Al}_2\text{O}_3$  crucible and heated from 30 to  $800^\circ\text{C}$  with a heating rate of  $10^\circ\text{C}\cdot\text{min}^{-1}$ . The infrared spectra were recorded on a Shimadzu IR Affinity-1 Fourier transform infrared spectrometer in the range of  $400 - 4000 \text{ cm}^{-1}$ . The sample was grounded and mixed with KBr. The UV–Vis–NIR diffuse reflectance spectra were measured at room temperature with a Shimadzu SolidSpec-3600DUV spectrophotometer in the 200–1100 nm wavelength range.

**Theoretical Calculations.** The electronic structures and optical properties for  $\text{Pb}_6\text{O}_4(\text{BO}_3)(\text{NO}_3)$  and  $\text{Pb}_6\text{O}_2(\text{BO}_3)_2(\text{NO}_3)\text{F}$  were calculated by using the CASTEP package.<sup>3</sup> The generalized gradient-approximation (GGA) with Perdew-Burke-Ernzerhof (PBE) functional was selected as exchange-correlation potential.<sup>4</sup> The norm-conserving pseudopotentials (NCP) were adopted to model the effective interaction between the valence electrons and atom cores.<sup>5</sup> The cut off energies and the dense  $K$ -points in the Brillouin zone were set as 820 eV and  $2 \times 2 \times 1$  for  $\text{Pb}_6\text{O}_4(\text{BO}_3)(\text{NO}_3)$ , and 850 eV and  $2 \times 1 \times 2$  for  $\text{Pb}_6\text{O}_2(\text{BO}_3)_2(\text{NO}_3)\text{F}$ . The configurations for diverse electron orbital were Pb:  $5s^25p^65d^{10}6s^26p^2$ , B:  $2s^22p^1$ , N:  $2s^22p^3$ , O:  $2s^22p^4$ , and F:  $2s^22p^5$ , respectively.

**Table S1.** Crystal data and structure refinements for  $\text{Pb}_6\text{O}_4(\text{BO}_3)(\text{NO}_3)$  and  $\text{Pb}_6\text{O}_2(\text{BO}_3)_2(\text{NO}_3)\text{F}$ .

| Compound                                         | $\text{Pb}_6\text{O}_4(\text{BO}_3)(\text{NO}_3)$          | $\text{Pb}_6\text{O}_2(\text{BO}_3)_2(\text{NO}_3)\text{F}$ |
|--------------------------------------------------|------------------------------------------------------------|-------------------------------------------------------------|
| Formula weight                                   | 1427.96                                                    | 1473.77                                                     |
| Temperature (K)                                  | 273.15                                                     |                                                             |
| Wavelength (Å)                                   | 0.71073                                                    |                                                             |
| Crystal system, space group                      | Orthorhombic, $Pmmn$                                       | Monoclinic, $P2_1/m$                                        |
| $a$ (Å)                                          | 5.7481(5)                                                  | 6.8025(7)                                                   |
| $b$ (Å)                                          | 9.4582(9)                                                  | 11.5092(9)                                                  |
| $c$ (Å)                                          | 11.2770(12)                                                | 8.8989(9)                                                   |
| $\beta$ (deg)                                    |                                                            | 101.704(4)                                                  |
| Volume (Å <sup>3</sup> )                         | 613.09(10)                                                 | 682.22(11)                                                  |
| Z, Calculated density (g·cm <sup>-3</sup> )      | 2, 7.735                                                   | 2, 7.174                                                    |
| Absorption coefficient (mm <sup>-1</sup> )       | 82.125                                                     | 73.830                                                      |
| $F(000)$                                         | 1168                                                       | 1212                                                        |
| Theta range for data collection (deg.)           | 2.811 to 27.530                                            | 2.337 to 27.509                                             |
| Limiting indices                                 | $-7 \leq h \leq 7, -12 \leq k \leq 12, -14 \leq l \leq 14$ | $-8 \leq h \leq 8, -14 \leq k \leq 14, -11 \leq l \leq 11$  |
| Reflections collected / unique                   | 6656 / 823 [R(int) = 0.0664]                               | 19582 / 1645 [R(int) = 0.0663]                              |
| Completeness                                     | 98.9 %                                                     | 100.0 %                                                     |
| Max. and min. transmission                       | 0.0206 and 0.0040                                          | 0.0481 and 0.0007                                           |
| Data / restraints / parameters                   | 823 / 0 / 58                                               | 1645 / 6 / 106                                              |
| GOF on $F^2$                                     | 1.048                                                      | 1.091                                                       |
| $R_1, wR_2 [F_o^2 > 2\sigma(F_o^2)]^a$           | 0.0327, 0.0869                                             | 0.0231, 0.0553                                              |
| $R_1, wR_2$ (all data) <sup>a</sup>              | 0.0412, 0.0918                                             | 0.0286, 0.0570                                              |
| Largest diff. peak and hole (e·Å <sup>-3</sup> ) | 1.926 and -1.843                                           | 1.811 and -1.526                                            |

<sup>a</sup>  $R_1 = \Sigma||F_o| - |F_c||/\Sigma|F_o|$  and  $wR_2 = [\Sigma w(F_o^2 - F_c^2)^2 / \Sigma w F_o^4]^{1/2}$  for  $F_o^2 > 2\sigma(F_o^2)$ .

**Table S2.** Atomic coordinates and equivalent isotropic displacement parameters for  $\text{Pb}_6\text{O}_4(\text{BO}_3)(\text{NO}_3)$  and  $\text{Pb}_6\text{O}_2(\text{BO}_3)_2(\text{NO}_3)\text{F}$ .  $U(\text{eq})$  is defined as one-third of the trace of the orthogonalized  $U_{ij}$  tensor.

|                                                             | <i>x</i>   | <i>y</i>   | <i>z</i>    | $U(\text{eq})$ | BVS  |
|-------------------------------------------------------------|------------|------------|-------------|----------------|------|
| $\text{Pb}_6\text{O}_4(\text{BO}_3)(\text{NO}_3)$           |            |            |             |                |      |
| Pb(1)                                                       | 0.7500     | 0.5561(1)  | 0.8203(1)   | 0.036(1)       | 2.37 |
| Pb(2)                                                       | 0.2500     | 0.2500     | 0.8658(1)   | 0.036(1)       | 2.06 |
| Pb(3)                                                       | 0.7500     | 0.2500     | 0.6436(1)   | 0.035(1)       | 2.18 |
| Pb(4)                                                       | 0.2500     | 0.0127(1)  | 0.6192(1)   | 0.036(1)       | 2.13 |
| N(1)                                                        | 0.2500     | 0.7500     | 0.9140(30)  | 0.054(7)       | 5.37 |
| B(1)                                                        | 0.7500     | 0.7500     | 0.5690(30)  | 0.039(7)       | 2.86 |
| O(1)                                                        | 0.2500     | 0.6390(20) | 0.9630(20)  | 0.100(7)       | 2.08 |
| O(2)                                                        | 0.2500     | 0.7500     | 0.8000(20)  | 0.080(9)       | 1.59 |
| O(3)                                                        | 1.0015(14) | 0.3972(8)  | 0.7542(7)   | 0.032(2)       | 2.46 |
| O(4)                                                        | 0.7500     | 0.6199(15) | 0.6294(14)  | 0.053(4)       | 1.84 |
| O(5)                                                        | 0.2500     | 0.02500    | 0.5512(17)  | 0.037(4)       | 2.19 |
| $\text{Pb}_6\text{O}_2(\text{BO}_3)_2(\text{NO}_3)\text{F}$ |            |            |             |                |      |
| Pb(1)                                                       | 0.0585(1)  | 0.2500     | 0.4166(1)   | 0.027(1)       | 1.93 |
| Pb(2)                                                       | 0.4354(1)  | 0.0934(1)  | 0.2047(1)   | 0.028(1)       | 2.25 |
| Pb(3)                                                       | 0.6063(1)  | 0.2500     | 0.5953(1)   | 0.027(1)       | 1.75 |
| Pb(4)                                                       | 1.0895(1)  | 0.4069(1)  | 0.7974(1)   | 0.028(1)       | 2.24 |
| N(1)                                                        | 0.7494(15) | 0.2500     | 0.0105(13)  | 0.040(3)       | 4.86 |
| B(1)                                                        | 0.7455(11) | -0.0015(8) | 0.5038(12)  | 0.030(2)       | 3.00 |
| F(1)                                                        | 1.2805(15) | 0.2500     | 0.9568(14)  | 0.079(3)       | 0.77 |
| O(1)                                                        | 0.7622(14) | 0.3449(6)  | -0.0549(10) | 0.067(2)       | 1.81 |
| O(2)                                                        | 0.7154(13) | 0.2500     | 0.1454(11)  | 0.044(2)       | 1.73 |
| O(3)                                                        | 0.6752(9)  | 0.0992(4)  | 0.4301(7)   | 0.033(1)       | 2.07 |
| O(4)                                                        | 0.7729(9)  | -0.0991(4) | 0.4226(7)   | 0.032(1)       | 2.09 |
| O(5)                                                        | 0.7925(8)  | -0.0026(5) | 0.6634(7)   | 0.037(1)       | 2.05 |
| O(6)                                                        | 0.3545(11) | 0.2500     | 0.3113(10)  | 0.031(2)       | 2.42 |
| O(7)                                                        | 0.9586(10) | 0.2500     | 0.6800(9)   | 0.024(2)       | 2.45 |

**Table S3.** Bond lengths [Å] and angles [deg] for  $\text{Pb}_6\text{O}_4(\text{BO}_3)(\text{NO}_3)$  and  $\text{Pb}_6\text{O}_2(\text{BO}_3)_2(\text{NO}_3)\text{F}$ .

| $\text{Pb}_6\text{O}_4(\text{BO}_3)(\text{NO}_3)$                                                                    |           |                     |           |
|----------------------------------------------------------------------------------------------------------------------|-----------|---------------------|-----------|
| Pb(1)-O(3)                                                                                                           | 2.215(8)  | N(1)-O(1)           | 1.19(3)   |
| Pb(1)-O(3)#2                                                                                                         | 2.215(8)  | N(1)-O(1)#9         | 1.19(3)   |
| Pb(1)-O(4)                                                                                                           | 2.236(15) | N(1)-O(2)           | 1.28(4)   |
| Pb(2)-O(3)#4                                                                                                         | 2.358(8)  | B(1)-O(4)#1         | 1.41(2)   |
| Pb(2)-O(3)#2                                                                                                         | 2.358(8)  | B(1)-O(4)           | 1.41(2)   |
| Pb(2)-O(3)#5                                                                                                         | 2.358(8)  | B(1)-O(5)#10        | 1.35(4)   |
| Pb(2)-O(3)#6                                                                                                         | 2.358(8)  |                     |           |
| Pb(3)-O(3)#8                                                                                                         | 2.363(8)  |                     |           |
| Pb(3)-O(3)                                                                                                           | 2.363(8)  | O(1)-N(1)-O(1)#9    | 124.0(4)  |
| Pb(3)-O(3)#5                                                                                                         | 2.363(8)  | O(1)#9-N(1)-O(2)    | 118.1(19) |
| Pb(3)-O(3)#2                                                                                                         | 2.363(8)  | O(1)-N(1)-O(2)      | 118.1(19) |
| Pb(4)-O(3)#5                                                                                                         | 2.254(8)  | O(4)#1-B(1)-O(4)    | 122.0(3)  |
| Pb(4)-O(3)#6                                                                                                         | 2.254(8)  | O(5)#10-B(1)-O(4)#1 | 119.1(13) |
| Pb(4)-O(5)                                                                                                           | 2.372(6)  | O(5)#10-B(1)-O(4)   | 119.1(13) |
| Symmetry transformations used to generate equivalent atoms:                                                          |           |                     |           |
| #1) $-x+3/2, -y+3/2, z$ ; #2) $-x+3/2, y, z$ ; #3) $-x+1/2, -y+1/2, z$ ; #4) $x-1, y, z$ ; #5) $-x+3/2, -y+1/2, z$ ; |           |                     |           |
| #6) $x-1, -y+1/2, z$ ; #7) $x+1, y, z$ ; #8) $x, -y+1/2, z$ ; #9) $-x+1/2, -y+3/2, z$ ; #10) $-x+1, -y+1, -z+1$ .    |           |                     |           |
| $\text{Pb}_6\text{O}_2(\text{BO}_3)_2(\text{NO}_3)\text{F}$                                                          |           |                     |           |
| Pb(1)-O(4)#1                                                                                                         | 2.390(6)  | N(1)-O(1)           | 1.249(9)  |
| Pb(1)-O(4)#2                                                                                                         | 2.390(6)  | N(1)-O(1)#4         | 1.249(9)  |
| Pb(1)-O(6)                                                                                                           | 2.387(7)  | N(1)-O(2)           | 1.267(14) |
| Pb(1)-O(7)#3                                                                                                         | 2.570(8)  | B(1)-O(3)           | 1.369(11) |
| Pb(2)-O(2)                                                                                                           | 2.750(7)  | B(1)-O(4)           | 1.369(11) |
| Pb(2)-O(3)                                                                                                           | 2.316(6)  | B(1)-O(5)           | 1.392(12) |
| Pb(2)-O(5)#1                                                                                                         | 2.369(5)  |                     |           |
| Pb(2)-O(6)                                                                                                           | 2.159(4)  |                     |           |
| Pb(3)-O(3)                                                                                                           | 2.381(6)  | O(1)#4-N(1)-O(1)    | 122.0(12) |
| Pb(3)-O(3)#4                                                                                                         | 2.381(6)  | O(1)#4-N(1)-O(2)    | 119.0(6)  |
| Pb(3)-O(6)                                                                                                           | 2.751(9)  | O(1)-N(1)-O(2)      | 119.0(6)  |
| Pb(3)-O(7)                                                                                                           | 2.362(7)  | O(3)-B(1)-O(5)      | 118.8(8)  |
| Pb(4)-F(1)                                                                                                           | 2.493(6)  | O(4)-B(1)-O(3)      | 120.9(8)  |
| Pb(4)-O(4)#5                                                                                                         | 2.336(6)  | O(4)-B(1)-O(5)      | 120.2(8)  |
| Pb(4)-O(5)#4                                                                                                         | 2.395(6)  |                     |           |
| Pb(4)-O(7)                                                                                                           | 2.184(4)  |                     |           |
| Symmetry transformations used to generate equivalent atoms:                                                          |           |                     |           |
| #1) $-x+1, -y, -z+1$ ; #2) $-x+1, y+1/2, -z+1$ ; #3) $x-1, y, z$ ; #4) $x, -y+1/2, z$ ; #5) $-x+2, y+1/2, -z+1$ ;    |           |                     |           |
| #6) $-x+2, y-1/2, -z+1$ ; #7) $x+1, y, z$ .                                                                          |           |                     |           |



**Table S4.** Crystallographic data for inorganic compounds containing anion-centered [OPb<sub>4</sub>] tetrahedra and  $\pi$ -conjugated units.

| compounds                                                                                                               | space group                  | Structural feature                                                                                    | ref       |
|-------------------------------------------------------------------------------------------------------------------------|------------------------------|-------------------------------------------------------------------------------------------------------|-----------|
| [Pb <sub>4</sub> O]Pb <sub>2</sub> (BO <sub>3</sub> ) <sub>3</sub> Cl                                                   | <i>Pbcm</i>                  | isolated [OPb <sub>4</sub> ] tetrahedra + BO <sub>3</sub> units                                       | 6         |
| [Pb <sub>4</sub> O]Pb <sub>2</sub> (BO <sub>3</sub> ) <sub>3</sub> F                                                    | <i>Pbcm</i>                  | isolated [OPb <sub>4</sub> ] tetrahedra + BO <sub>3</sub> units                                       | 7         |
| [Pb <sub>4</sub> O]Pb <sub>2</sub> (BO <sub>3</sub> ) <sub>3</sub> Br                                                   | <i>Pbcm</i>                  | isolated [OPb <sub>4</sub> ] tetrahedra + BO <sub>3</sub> units                                       | 7         |
| Pb[Pb <sub>4</sub> O](OH) <sub>2</sub> (CO <sub>3</sub> )                                                               | <i>P6<sub>3</sub>cm</i>      | isolated [OPb <sub>4</sub> ] tetrahedra + CO <sub>3</sub> units                                       | 8         |
| [Pb <sub>8</sub> O <sub>3</sub> ](BO <sub>3</sub> ) <sub>2</sub> (B <sub>2</sub> O <sub>5</sub> )                       | <i>Aba2</i>                  | isolated [O <sub>3</sub> Pb <sub>8</sub> ] cluster + BO <sub>3</sub> units                            | 9         |
| [Pb <sub>13</sub> O <sub>8</sub> ](OH) <sub>6</sub> (NO <sub>3</sub> ) <sub>4</sub>                                     | <i>R<math>\bar{3}</math></i> | isolated [O <sub>8</sub> Pb <sub>13</sub> ] cluster + NO <sub>3</sub> units                           | 10        |
| Pb <sub>6</sub> O <sub>2</sub> (BO <sub>3</sub> ) <sub>3</sub> (SO <sub>4</sub> )                                       | <i>Pnma</i>                  | [O <sub>2</sub> Pb <sub>6</sub> ] chain + BO <sub>3</sub> units                                       | 11        |
| Pb <sub>6</sub> O <sub>2</sub> (BO <sub>3</sub> ) <sub>3</sub> (MoO <sub>4</sub> )                                      | <i>Cmcm</i>                  | [O <sub>2</sub> Pb <sub>6</sub> ] chain + BO <sub>3</sub> units                                       | 12        |
| Pb <sub>6</sub> O <sub>2</sub> (BO <sub>3</sub> ) <sub>3</sub> (CrO <sub>4</sub> )                                      | <i>Pnma</i>                  | [O <sub>2</sub> Pb <sub>6</sub> ] chain + BO <sub>3</sub> units                                       | 12        |
| [Pb <sub>3</sub> O <sub>2</sub> ](CO <sub>3</sub> )                                                                     | <i>Pnma</i>                  | [O <sub>2</sub> Pb <sub>3</sub> ] chain + CO <sub>3</sub> units                                       | 13        |
| [Pb <sub>3</sub> O <sub>2</sub> ] <sub>2</sub> (OH)(NO <sub>3</sub> )(CO <sub>3</sub> )                                 | <i>Pnma</i>                  | [O <sub>2</sub> Pb <sub>3</sub> ] chain + CO <sub>3</sub> /NO <sub>3</sub> units                      | 14        |
| [Pb <sub>3</sub> O <sub>2</sub> ](OH)(NO <sub>3</sub> )                                                                 | <i>Pca2<sub>1</sub></i>      | [O <sub>2</sub> Pb <sub>3</sub> ] chain + NO <sub>3</sub> units                                       | 15        |
| Pb <sub>2</sub> (O <sub>4</sub> Pb <sub>8</sub> )(BO <sub>3</sub> ) <sub>3</sub> Br <sub>3</sub>                        | <i>C2/c</i>                  | [OPb <sub>2</sub> ] chain + BO <sub>3</sub> units                                                     | 16        |
| Pb <sub>2</sub> (O <sub>8</sub> Pb <sub>12</sub> )(BO <sub>3</sub> ) <sub>2</sub> Br <sub>6</sub>                       | <i>C2/c</i>                  | [O <sub>2</sub> Pb <sub>3</sub> ] ribbon + BO <sub>3</sub> units                                      | 16        |
| [O <sub>2</sub> Pb <sub>3</sub> ] <sub>2</sub> (BO <sub>3</sub> )Br                                                     | <i>Cmcm</i>                  | [O <sub>2</sub> Pb <sub>3</sub> ] double chain + BO <sub>3</sub> units                                | 17        |
| Pb <sub>47</sub> O <sub>24</sub> (OH) <sub>13</sub> Cl <sub>25</sub> (BO <sub>3</sub> ) <sub>2</sub> (CO <sub>3</sub> ) | <i>Cm</i>                    | [Pb <sub>44</sub> O <sub>24</sub> (OH) <sub>12</sub> ] layer + BO <sub>3</sub> /CO <sub>3</sub> units | 18        |
| Pb <sub>6</sub> O <sub>4</sub> (BO <sub>3</sub> )(NO <sub>3</sub> )                                                     | <i>Pmmn</i>                  | [O <sub>4</sub> Pb <sub>6</sub> ] double chain + BO <sub>3</sub> /NO <sub>3</sub> units               | This work |
| Pb <sub>6</sub> O <sub>2</sub> (BO <sub>3</sub> ) <sub>2</sub> (NO <sub>3</sub> )F                                      | <i>P2<sub>1</sub>/m</i>      | [O <sub>2</sub> Pb <sub>6</sub> ] chain + BO <sub>3</sub> /NO <sub>3</sub> units                      | This work |



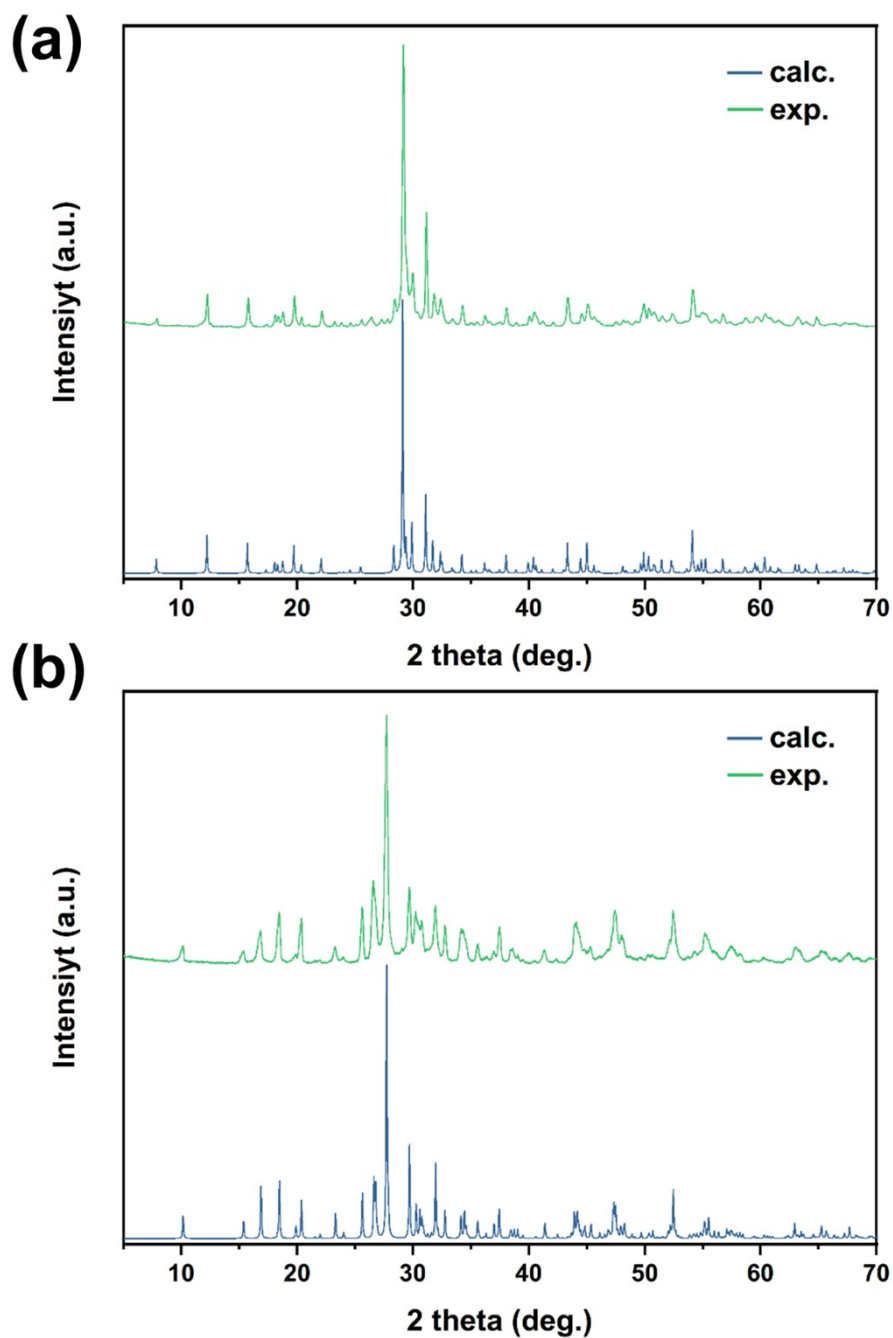

**Figure S1.** The calculated and experimental powder XRD patterns of (a)  $\text{Pb}_6\text{O}_4(\text{BO}_3)(\text{NO}_3)$  and (b)  $\text{Pb}_6\text{O}_2(\text{BO}_3)_2(\text{NO}_3)\text{F}$ .

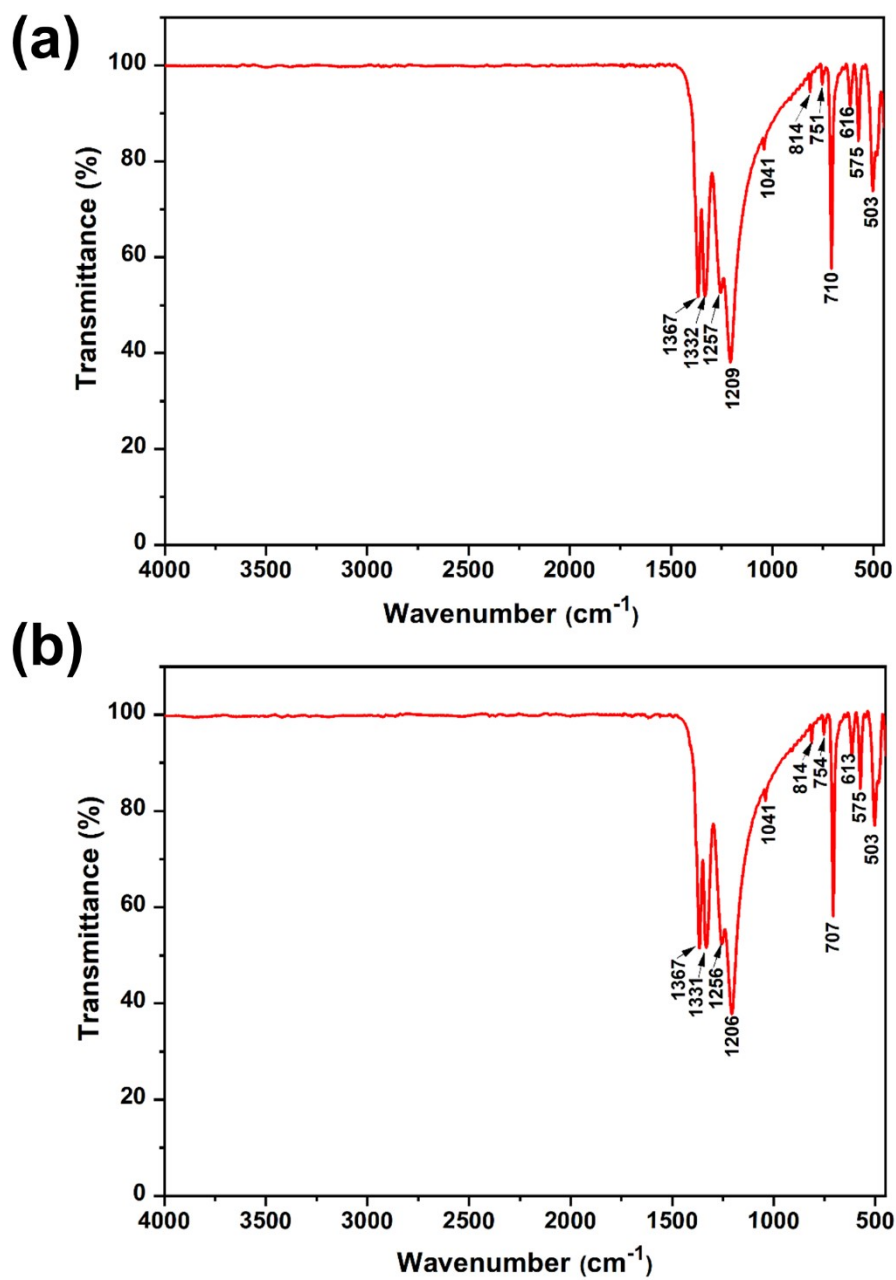

**Figure S2.** The IR spectra of (a)  $\text{Pb}_6\text{O}_4(\text{BO}_3)(\text{NO}_3)$  and (b)  $\text{Pb}_6\text{O}_2(\text{BO}_3)_2(\text{NO}_3)\text{F}$ .

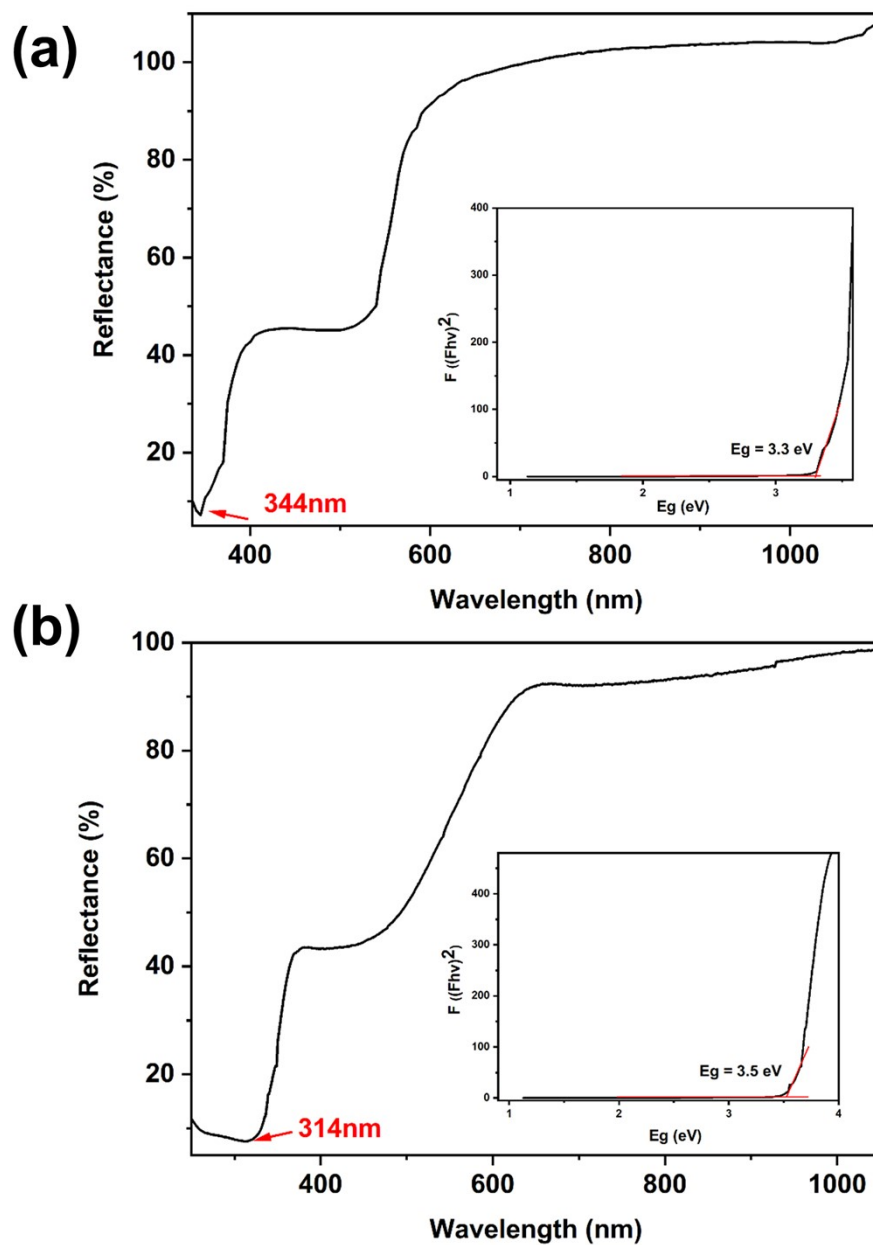

**Figure S3.** The UV-Vis-NIR diffuse reflectance spectra of (a)  $\text{Pb}_6\text{O}_4(\text{BO}_3)(\text{NO}_3)$  and (b)  $\text{Pb}_6\text{O}_2(\text{BO}_3)_2(\text{NO}_3)\text{F}$ .

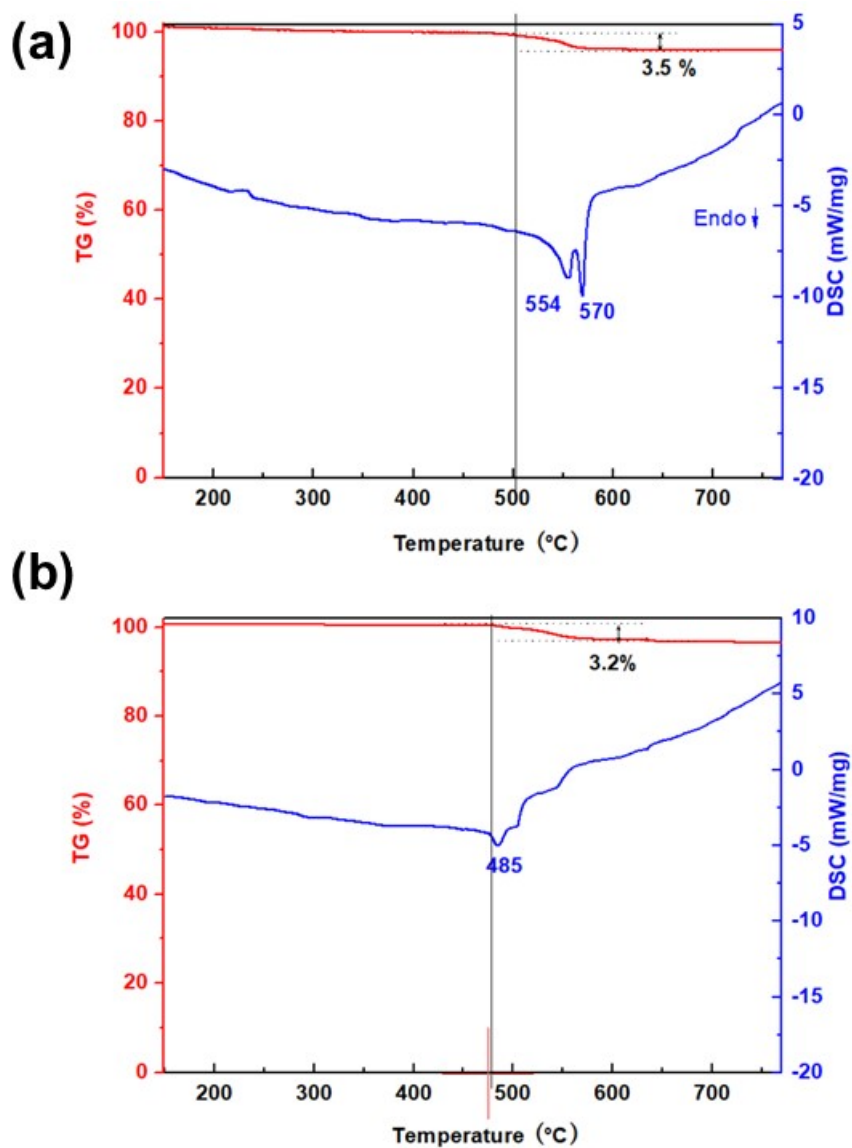

**Figure S4.** The TG and DSC curves of (a)  $\text{Pb}_6\text{O}_4(\text{BO}_3)(\text{NO}_3)$  and (b)  $\text{Pb}_6\text{O}_2(\text{BO}_3)_2(\text{NO}_3)\text{F}$ .

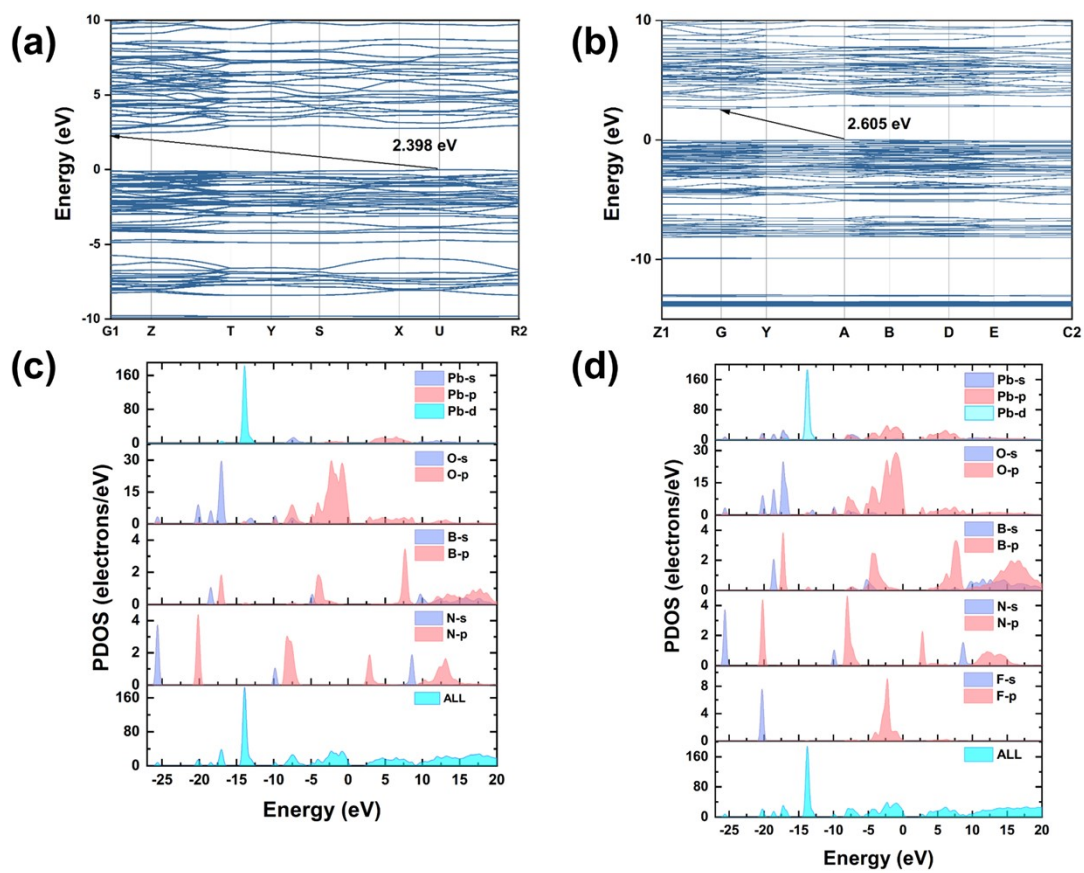

**Figure S5.** The bandgap of (a)  $\text{Pb}_6\text{O}_4(\text{BO}_3)(\text{NO}_3)$  and (b)  $\text{Pb}_6\text{O}_2(\text{BO}_3)_2(\text{NO}_3)\text{F}$ . The PDOS of (c)  $\text{Pb}_6\text{O}_4(\text{BO}_3)(\text{NO}_3)$  and (d)  $\text{Pb}_6\text{O}_2(\text{BO}_3)_2(\text{NO}_3)\text{F}$ .

## Reference

1. SAINT, *Version 7.60A, Bruker analytical X-ray Instruments, inc., Madison, WI, 2008.*
2. O. V. Dolomanov, L. J. Bourhis, R. J. Gildea, J. A. K. Howard and H. Puschmann, *J. Appl. Cryst.*, 2009, **42**, 339–341.
3. S. J. Clark, M. D. Segall, C. J. Pickard, P. J. Hasnip, M. I. J. Probert, K. Refson and M. C. Payne, *Z. Kristallogr.*, 2005, **220**, 567–570.
4. J. S. Lin, A. Qteish, M. C. Payne and V. Heine, *Phys. Rev. B*, 1993, **47**, 4174–4180.
5. A. M. Rappe, K. M. Rabe, E. Kaxiras and J. D. Joannopoulos, *Phys. Rev. B*, 1990, **41**, 1227–1230.
6. H. Behm, *Acta Cryst. C*, 1983, **39**, 1317-1319.
7. L. Y. Dong, S. L. Pan, H. P. Wu, X. Su, H. W. Yu, Y. Wang, Z. H. Chen, Z. J. Huang and Z. H. Yang, *J. Solid State Chem.*, 2013, **204**, 64-69.
8. S. V. Krivovichev and P. C. Burns, *Mineral. Mag.*, 2000, **64**, 1069-1075.
9. H. W. Yu, S. L. Pan, H. P. Wu, W. W. Zhao, F. F. Zhang, H. Y. Li and Z. H. Yang, *J. Mater. Chem.*, 2012, **22**, 2105-2110.
10. Y. Li, S. V. Krivovichev and P. C. Burns, *J. Solid State Chem.*, 2001, **158**, 74-77.
11. B. Aurivillius, *Chem. Scr.*, 1983, **22**, 168-170.
12. X. A. Chen, F. P. Song, X. N. Chang, H. G. Zang and W. Q. Xiao, *J. Solid State Chem.*, 2009, **182**, 3091-3097.
13. S. V. Krivovichev and P. C. Burns, *Mineral. Mag.*, 2000, **64**, 1077-1087.
14. Y. Li, S. V. Krivovichev and P. C. Burns, *J. Solid State Chem.*, 2000, **153**, 365-370.
15. S. V. Krivovichev, Y. Li and P. C. Burns, *J. Solid State Chem.*, 2001, **158**, 78-81.
16. L. Y. Dong, S. L. Pan, Y. Wang, H. W. Yu, X. Y. Dong, S. J. Han and M. Zhang, *Inorg. Chem.*, 2013, **52**, 11377-11384.
17. L. Y. Dong, J. Yang, S. G. Shen, Z. Z. Liu, X. J. Chen and S. F. Sun, *Z. Anorg. Allg. Chem.*, 2017, **643**, 471-476.
18. S. V. Krivovichev, R. Turner, M. Rumsey, O. I. Sidra and C. A. Kirk, *Mineral. Mag.*, 2009, **73**, 103-117.
